# Supplementary material for: Predictive models for bariatric surgery risks with imbalanced medical datasets
Source: Springer Nature journal article supplement (doi:10.1007/s10479-019-03156-8), 2019-02-01
Supplement: 10479_2019_3156_MOESM1_ESM.pdf [file 10479_2019_3156_MOESM1_ESM.pdf]

---

## Supplementary Materials

In this section, the ICD-9 codes for the clinical attributes and outcomes are listed in Tables (A1). The results for Angina, Heart Failure, and Stroke outcomes are shown in Tables (A2-4). In Table (A5), the values of the “ROC Area” computed for all four outcomes (when applying SVM with both linear and RBF kernel functions) demonstrate the significance of the benefit obtained by the RBF kernel function (highlighted in bold) to the linear kernel function.

Table A1. ICD-9 Codes used to extract the records for the clinical attributes and outcomes

| Attributes or Outcome                   | ICD-9 Code                             | Attributes or Outcome     | ICD-9 Code            |
|-----------------------------------------|----------------------------------------|---------------------------|-----------------------|
| Angina                                  | 413                                    | Heart Failure             | 428                   |
| Bariatric Surgery                       | 43.89,44.38,44.39,44.68,44.95          | Hypertension              | 401                   |
| Blindness                               | 264.5,368.6,368.61,368.69,377.75,V19.0 | Myocardial infarction     | 410                   |
| P Chronic obstructive pulmonary disease | 490-492,494,496                        | Obesity                   | 278.01,V85.35 - V85.4 |
| Coronary Artery Disease                 | 414                                    | Sleep Apnea               | 780.5                 |
| Death                                   | 798                                    | Stroke                    | 43X.X0,43X.X1         |
| Diabetes Manifestation                  | 250.4X,250.5X,250.6X,250.7X            | Tobacco Abuse             | 305.1                 |
| Diabetes T2DM                           | 250.X0,250.X2                          | Transient ischemic Attack | 435                   |
| Dyslipidemia                            | 272                                    |                           |                       |

Table A2. Results for Heart Failure outcome. U: Undersampling, O: Oversampling.

| Classifier    | Feature Selection | Acc  |      | G-mean |      | Precision |      | Sensitivity |      | Specificity |      | F-measure |      | ROC area |      |
|---------------|-------------------|------|------|--------|------|-----------|------|-------------|------|-------------|------|-----------|------|----------|------|
|               |                   | U    | O    | U      | O    | U         | O    | U           | O    | U           | O    | U         | O    | U        | O    |
| Naive Bayes   | Chi-Squared       | 0.72 | 0.73 | 0.72   | 0.73 | 0.72      | 0.74 | 0.72        | 0.71 | 0.72        | 0.75 | 0.72      | 0.73 | 0.79     | 0.80 |
|               | Information Gain  | 0.72 | 0.73 | 0.72   | 0.73 | 0.72      | 0.74 | 0.72        | 0.71 | 0.72        | 0.75 | 0.72      | 0.73 | 0.79     | 0.80 |
|               | CFS               | 0.71 | 0.73 | 0.70   | 0.73 | 0.69      | 0.72 | 0.76        | 0.77 | 0.65        | 0.70 | 0.72      | 0.74 | 0.78     | 0.81 |
| RBFN          | Chi-Squared       | 0.71 | 0.63 | 0.70   | 0.56 | 0.77      | 0.83 | 0.60        | 0.34 | 0.82        | 0.93 | 0.67      | 0.48 | 0.76     | 0.70 |
|               | Information Gain  | 0.71 | 0.69 | 0.70   | 0.68 | 0.77      | 0.78 | 0.60        | 0.55 | 0.82        | 0.84 | 0.67      | 0.64 | 0.76     | 0.75 |
|               | CFS               | 0.71 | 0.67 | 0.70   | 0.66 | 0.75      | 0.64 | 0.63        | 0.80 | 0.79        | 0.54 | 0.68      | 0.71 | 0.77     | 0.73 |
| 5NN           | Chi-Squared       | 0.68 | 0.88 | 0.68   | 0.88 | 0.68      | 0.87 | 0.72        | 0.90 | 0.65        | 0.86 | 0.70      | 0.88 | 0.76     | 0.95 |
|               | Information Gain  | 0.68 | 0.88 | 0.68   | 0.88 | 0.68      | 0.87 | 0.72        | 0.90 | 0.65        | 0.86 | 0.70      | 0.88 | 0.76     | 0.95 |
|               | CFS               | 0.71 | 0.87 | 0.71   | 0.87 | 0.73      | 0.84 | 0.67        | 0.92 | 0.75        | 0.82 | 0.70      | 0.87 | 0.76     | 0.95 |
| C4.5 (J48)    | Chi-Squared       | 0.70 | 0.93 | 0.70   | 0.93 | 0.71      | 0.94 | 0.70        | 0.92 | 0.71        | 0.94 | 0.70      | 0.93 | 0.75     | 0.97 |
|               | Information Gain  | 0.70 | 0.93 | 0.70   | 0.93 | 0.71      | 0.94 | 0.70        | 0.92 | 0.71        | 0.94 | 0.70      | 0.93 | 0.75     | 0.97 |
|               | CFS               | 0.71 | 0.91 | 0.71   | 0.91 | 0.75      | 0.92 | 0.64        | 0.91 | 0.78        | 0.92 | 0.69      | 0.91 | 0.75     | 0.96 |
| SVM           | Chi-Squared       | 0.71 | 0.88 | 0.71   | 0.88 | 0.74      | 0.91 | 0.65        | 0.88 | 0.77        | 0.91 | 0.69      | 0.87 | 0.71     | 0.88 |
|               | Information Gain  | 0.71 | 0.88 | 0.71   | 0.88 | 0.74      | 0.91 | 0.65        | 0.84 | 0.77        | 0.92 | 0.69      | 0.88 | 0.71     | 0.88 |
|               | CFS               | 0.72 | 0.87 | 0.72   | 0.87 | 0.75      | 0.89 | 0.67        | 0.86 | 0.77        | 0.89 | 0.70      | 0.87 | 0.72     | 0.88 |
| LR            | Chi-Squared       | 0.72 | 0.75 | 0.72   | 0.75 | 0.71      | 0.75 | 0.74        | 0.75 | 0.70        | 0.75 | 0.72      | 0.75 | 0.80     | 0.83 |
|               | Information Gain  | 0.72 | 0.75 | 0.72   | 0.75 | 0.71      | 0.75 | 0.74        | 0.75 | 0.70        | 0.75 | 0.72      | 0.75 | 0.80     | 0.83 |
|               | CFS               | 0.70 | 0.74 | 0.70   | 0.74 | 0.69      | 0.74 | 0.76        | 0.75 | 0.65        | 0.73 | 0.72      | 0.75 | 0.78     | 0.82 |
| Random Forest | Chi-Squared       | 0.66 | 0.95 | 0.66   | 0.95 | 0.66      | 0.94 | 0.67        | 0.96 | 0.66        | 0.94 | 0.66      | 0.95 | 0.74     | 0.98 |
|               | Information Gain  | 0.66 | 0.95 | 0.66   | 0.95 | 0.66      | 0.94 | 0.67        | 0.96 | 0.66        | 0.94 | 0.66      | 0.95 | 0.74     | 0.98 |
|               | CFS               | 0.71 | 0.94 | 0.71   | 0.94 | 0.73      | 0.93 | 0.67        | 0.96 | 0.76        | 0.92 | 0.70      | 0.94 | 0.76     | 0.98 |
| AdaBoostM1    | Chi-Squared       | 0.70 | 0.79 | 0.70   | 0.79 | 0.70      | 0.81 | 0.71        | 0.76 | 0.70        | 0.82 | 0.71      | 0.78 | 0.79     | 0.88 |
|               | Information Gain  | 0.70 | 0.79 | 0.70   | 0.79 | 0.70      | 0.81 | 0.71        | 0.76 | 0.70        | 0.82 | 0.71      | 0.78 | 0.79     | 0.88 |
|               | CFS               | 0.69 | 0.79 | 0.69   | 0.79 | 0.67      | 0.81 | 0.77        | 0.76 | 0.62        | 0.82 | 0.72      | 0.78 | 0.78     | 0.88 |
| Bagging       | Chi-Squared       | 0.70 | 0.94 | 0.70   | 0.94 | 0.70      | 0.94 | 0.70        | 0.94 | 0.69        | 0.94 | 0.70      | 0.94 | 0.78     | 0.98 |
|               | Information Gain  | 0.70 | 0.94 | 0.70   | 0.94 | 0.70      | 0.94 | 0.70        | 0.94 | 0.69        | 0.94 | 0.70      | 0.94 | 0.78     | 0.98 |
|               | CFS               | 0.70 | 0.93 | 0.70   | 0.93 | 0.72      | 0.93 | 0.68        | 0.94 | 0.73        | 0.92 | 0.69      | 0.93 | 0.78     | 0.98 |

Table A3. Results for Angina outcome.U: Undersampling, O: Oversampling.

| Classifier    | Feature Selection | Acc  |      | G-mean |      | Precision |      | Sensitivity |      | Specificity |      | F-measure |      | ROC area |      |
|---------------|-------------------|------|------|--------|------|-----------|------|-------------|------|-------------|------|-----------|------|----------|------|
|               |                   | U    | O    | U      | O    | U         | O    | U           | O    | U           | O    | U         | O    | U        | O    |
| Naive Bayes   | Chi-Squared       | 0.74 | 0.74 | 0.72   | 0.74 | 0.68      | 0.72 | 0.90        | 0.80 | 0.57        | 0.68 | 0.77      | 0.76 | 0.66     | 0.82 |
|               | Information Gain  | 0.74 | 0.74 | 0.72   | 0.74 | 0.68      | 0.72 | 0.90        | 0.80 | 0.57        | 0.68 | 0.77      | 0.76 | 0.66     | 0.82 |
|               | CFS               | 0.74 | 0.73 | 0.72   | 0.73 | 0.68      | 0.76 | 0.90        | 0.68 | 0.57        | 0.78 | 0.77      | 0.72 | 0.66     | 0.82 |
| RBFN          | Chi-Squared       | 0.73 | 0.64 | 0.70   | 0.62 | 0.67      | 0.68 | 0.90        | 0.51 | 0.55        | 0.76 | 0.77      | 0.58 | 0.64     | 0.70 |
|               | Information Gain  | 0.73 | 0.71 | 0.70   | 0.69 | 0.67      | 0.85 | 0.90        | 0.52 | 0.91        | 0.77 | 0.65      | 0.64 | 0.80     |      |
|               | CFS               | 0.73 | 0.74 | 0.70   | 0.74 | 0.67      | 0.80 | 0.90        | 0.65 | 0.55        | 0.84 | 0.77      | 0.72 | 0.64     | 0.82 |
| 5NN           | Chi-Squared       | 0.73 | 0.97 | 0.70   | 0.97 | 0.67      | 0.96 | 0.90        | 0.97 | 0.55        | 0.96 | 0.77      | 0.97 | 0.65     | 0.99 |
|               | Information Gain  | 0.73 | 0.97 | 0.70   | 0.97 | 0.67      | 0.96 | 0.90        | 0.97 | 0.55        | 0.96 | 0.77      | 0.97 | 0.65     | 0.99 |
|               | CFS               | 0.73 | 0.96 | 0.70   | 0.96 | 0.67      | 0.95 | 0.90        | 0.98 | 0.55        | 0.95 | 0.77      | 0.97 | 0.65     | 0.99 |
| C4.5 (J48)    | Chi-Squared       | 0.73 | 0.99 | 0.70   | 0.99 | 0.67      | 0.99 | 0.90        | 1.00 | 0.55        | 0.99 | 0.77      | 0.99 | 0.64     | 1.00 |
|               | Information Gain  | 0.73 | 0.99 | 0.70   | 0.99 | 0.67      | 0.99 | 0.90        | 1.00 | 0.55        | 0.99 | 0.77      | 0.99 | 0.64     | 1.00 |
|               | CFS               | 0.73 | 0.99 | 0.70   | 0.99 | 0.67      | 0.99 | 0.90        | 0.99 | 0.55        | 0.99 | 0.77      | 0.99 | 0.64     | 1.00 |
| SVM           | Chi-Squared       | 0.74 | 0.98 | 0.72   | 0.98 | 0.68      | 0.98 | 0.90        | 0.97 | 0.57        | 0.98 | 0.77      | 0.98 | 0.74     | 0.98 |
|               | Information Gain  | 0.73 | 0.98 | 0.71   | 0.98 | 0.67      | 0.98 | 0.90        | 0.97 | 0.56        | 0.98 | 0.77      | 0.98 | 0.74     | 0.98 |
|               | CFS               | 0.73 | 0.97 | 0.71   | 0.97 | 0.67      | 0.98 | 0.90        | 0.97 | 0.56        | 0.98 | 0.77      | 0.97 | 0.74     | 0.97 |
| LR            | Chi-Squared       | 0.74 | 0.79 | 0.72   | 0.78 | 0.68      | 0.77 | 0.90        | 0.82 | 0.57        | 0.75 | 0.77      | 0.79 | 0.66     | 0.85 |
|               | Information Gain  | 0.74 | 0.78 | 0.72   | 0.78 | 0.68      | 0.76 | 0.90        | 0.82 | 0.57        | 0.74 | 0.77      | 0.79 | 0.66     | 0.85 |
|               | CFS               | 0.74 | 0.78 | 0.72   | 0.78 | 0.68      | 0.76 | 0.90        | 0.83 | 0.57        | 0.74 | 0.77      | 0.79 | 0.66     | 0.85 |
| Random Forest | Chi-Squared       | 0.73 | 1.00 | 0.70   | 1.00 | 0.67      | 0.99 | 0.90        | 1.00 | 0.90        | 0.99 | 0.55      | 1.00 | 0.66     | 1.00 |
|               | Information Gain  | 0.73 | 1.00 | 0.70   | 1.00 | 0.67      | 0.99 | 0.90        | 1.00 | 0.55        | 0.99 | 0.77      | 1.00 | 0.66     | 1.00 |
|               | CFS               | 0.73 | 1.00 | 0.70   | 1.00 | 0.67      | 0.99 | 0.90        | 1.00 | 0.55        | 0.99 | 0.77      | 1.00 | 0.66     | 1.00 |
| AdaBoostM1    | Chi-Squared       | 0.74 | 0.84 | 0.72   | 0.84 | 0.68      | 0.83 | 0.90        | 0.86 | 0.57        | 0.83 | 0.77      | 0.85 | 0.67     | 0.93 |
|               | Information Gain  | 0.73 | 0.84 | 0.71   | 0.84 | 0.67      | 0.83 | 0.90        | 0.86 | 0.56        | 0.83 | 0.77      | 0.85 | 0.67     | 0.93 |
|               | CFS               | 0.73 | 0.84 | 0.71   | 0.84 | 0.67      | 0.83 | 0.90        | 0.86 | 0.56        | 0.83 | 0.77      | 0.85 | 0.67     | 0.93 |
| Bagging       | Chi-Squared       | 0.73 | 1.00 | 0.70   | 1.00 | 0.67      | 0.99 | 0.90        | 1.00 | 0.55        | 0.99 | 0.77      | 1.00 | 0.69     | 1.00 |
|               | Information Gain  | 0.73 | 1.00 | 0.70   | 1.00 | 0.67      | 0.99 | 0.90        | 1.00 | 0.55        | 0.99 | 0.77      | 1.00 | 0.69     | 1.00 |
|               | CFS               | 0.73 | 0.99 | 0.70   | 0.99 | 0.67      | 0.99 | 0.90        | 1.00 | 0.55        | 0.99 | 0.77      | 0.99 | 0.69     | 1.00 |

Table A4. Results for Stroke outcome. U: Undersampling, O: Oversampling.

| Classifier    | Feature Selection | Acc  |      | G-mean |      | Precision |      | Sensitivity |      | Specificity |      | F-measure |      | ROC area |      |
|---------------|-------------------|------|------|--------|------|-----------|------|-------------|------|-------------|------|-----------|------|----------|------|
|               |                   | U    | O    | U      | O    | U         | O    | U           | O    | U           | O    | U         | O    | U        | O    |
| Naive Bayes   | Chi-Squared       | 0.67 | 0.74 | 0.67   | 0.74 | 0.63      | 0.73 | 0.84        | 0.77 | 0.55        | 0.71 | 0.72      | 0.75 | 0.65     | 0.83 |
|               | Information Gain  | 0.67 | 0.74 | 0.67   | 0.74 | 0.63      | 0.73 | 0.84        | 0.77 | 0.55        | 0.71 | 0.72      | 0.75 | 0.65     | 0.83 |
|               | CFS               | 0.67 | 0.74 | 0.67   | 0.74 | 0.63      | 0.73 | 0.84        | 0.75 | 0.55        | 0.72 | 0.72      | 0.74 | 0.65     | 0.84 |
| RBFN          | Chi-Squared       | 0.69 | 0.67 | 0.66   | 0.67 | 0.64      | 0.65 | 0.86        | 0.76 | 0.51        | 0.59 | 0.73      | 0.70 | 0.67     | 0.75 |
|               | Information Gain  | 0.69 | 0.71 | 0.66   | 0.69 | 0.64      | 0.82 | 0.86        | 0.53 | 0.51        | 0.88 | 0.73      | 0.65 | 0.67     | 0.79 |
|               | CFS               | 0.69 | 0.71 | 0.66   | 0.70 | 0.64      | 0.67 | 0.86        | 0.81 | 0.51        | 0.60 | 0.73      | 0.74 | 0.67     | 0.82 |
| 5NN           | Chi-Squared       | 0.65 | 0.96 | 0.62   | 0.96 | 0.61      | 0.96 | 0.86        | 0.97 | 0.44        | 0.96 | 0.71      | 0.96 | 0.60     | 0.99 |
|               | Information Gain  | 0.65 | 0.96 | 0.62   | 0.96 | 0.61      | 0.96 | 0.86        | 0.97 | 0.44        | 0.96 | 0.71      | 0.96 | 0.60     | 0.99 |
|               | CFS               | 0.65 | 0.96 | 0.62   | 0.96 | 0.61      | 0.95 | 0.86        | 0.98 | 0.44        | 0.94 | 0.71      | 0.96 | 0.60     | 0.99 |
| C4.5 (J48)    | Chi-Squared       | 0.64 | 0.99 | 0.61   | 0.99 | 0.60      | 0.99 | 0.84        | 0.99 | 0.44        | 0.99 | 0.70      | 0.99 | 0.60     | 1.00 |
|               | Information Gain  | 0.64 | 0.99 | 0.61   | 0.99 | 0.60      | 0.99 | 0.84        | 0.99 | 0.44        | 0.99 | 0.70      | 0.99 | 0.60     | 1.00 |
|               | CFS               | 0.64 | 0.99 | 0.61   | 0.99 | 0.60      | 0.99 | 0.84        | 0.99 | 0.44        | 0.99 | 0.70      | 0.99 | 0.60     | 1.00 |
| SVM           | Chi-Squared       | 0.67 | 0.97 | 0.65   | 0.97 | 0.63      | 0.98 | 0.84        | 0.97 | 0.51        | 0.98 | 0.72      | 0.97 | 0.67     | 0.97 |
|               | Information Gain  | 0.67 | 0.97 | 0.65   | 0.97 | 0.63      | 0.98 | 0.84        | 0.97 | 0.51        | 0.98 | 0.72      | 0.97 | 0.67     | 0.97 |
|               | CFS               | 0.67 | 0.97 | 0.65   | 0.97 | 0.63      | 0.97 | 0.84        | 0.97 | 0.51        | 0.97 | 0.72      | 0.97 | 0.67     | 0.97 |
| LR            | Chi-Squared       | 0.67 | 0.74 | 0.65   | 0.74 | 0.63      | 0.75 | 0.84        | 0.74 | 0.51        | 0.75 | 0.72      | 0.74 | 0.63     | 0.84 |
|               | Information Gain  | 0.67 | 0.74 | 0.65   | 0.74 | 0.63      | 0.74 | 0.84        | 0.74 | 0.51        | 0.75 | 0.72      | 0.74 | 0.63     | 0.84 |
|               | CFS               | 0.67 | 0.73 | 0.65   | 0.73 | 0.63      | 0.73 | 0.84        | 0.74 | 0.51        | 0.73 | 0.72      | 0.73 | 0.63     | 0.83 |
| Random Forest | Chi-Squared       | 0.67 | 1.00 | 0.65   | 1.00 | 0.63      | 0.99 | 0.84        | 1.00 | 0.51        | 0.99 | 0.72      | 1.00 | 0.64     | 1.00 |
|               | Information Gain  | 0.67 | 1.00 | 0.65   | 1.00 | 0.63      | 0.99 | 0.84        | 1.00 | 0.51        | 0.99 | 0.72      | 1.00 | 0.64     | 1.00 |
|               | CFS               | 0.67 | 1.00 | 0.65   | 1.00 | 0.63      | 0.99 | 0.84        | 1.00 | 0.51        | 0.99 | 0.72      | 1.00 | 0.64     | 1.00 |
| AdaBoostM1    | Chi-Squared       | 0.67 | 0.83 | 0.65   | 0.83 | 0.63      | 0.82 | 0.84        | 0.85 | 0.51        | 0.82 | 0.72      | 0.84 | 0.64     | 0.92 |
|               | Information Gain  | 0.67 | 0.83 | 0.65   | 0.83 | 0.63      | 0.82 | 0.84        | 0.85 | 0.51        | 0.82 | 0.72      | 0.84 | 0.64     | 0.92 |
|               | CFS               | 0.67 | 0.82 | 0.65   | 0.82 | 0.63      | 0.81 | 0.84        | 0.84 | 0.51        | 0.80 | 0.72      | 0.82 | 0.64     | 0.91 |
| Bagging       | Chi-Squared       | 0.67 | 0.99 | 0.65   | 0.99 | 0.63      | 0.99 | 0.84        | 1.00 | 0.51        | 0.99 | 0.72      | 0.99 | 0.67     | 1.00 |
|               | Information Gain  | 0.67 | 0.99 | 0.65   | 0.99 | 0.63      | 0.99 | 0.84        | 1.00 | 0.51        | 0.99 | 0.72      | 0.99 | 0.67     | 1.00 |
|               | CFS               | 0.67 | 0.99 | 0.65   | 0.99 | 0.63      | 0.99 | 0.84        | 1.00 | 0.51        | 0.99 | 0.72      | 0.99 | 0.67     | 1.00 |

Table A5. Comparative ROC area results for SVM using Linear kernel against RBF kernel

---

| Outcome       | Linear kernel | RBF kernel  |
|---------------|---------------|-------------|
| Diabetes      | 0.62          | <b>0.70</b> |
| Heart Failure | 0.75          | <b>0.88</b> |
| Stroke        | 0.75          | <b>0.97</b> |
| Angina        | 0.79          | <b>0.98</b> |

---
